# Supplementary material for: A cocrystal is the key intermediates for the production of a new polymorph of Vorinostat
Source: Royal Society of Chemistry journal article supplement (doi:10.1039/c1ce05799e), 2011-11-21

## Supporting Information

Article title: "Cocrystals are the key intermediates for the production of a new polymorph of Vorinostat"

Authors: *Cristina Puigjaner*,<sup>\*a</sup> *Rafael Barbas*,<sup>a</sup> *Anna Portell*,<sup>a</sup> *Ismael Valverde*,<sup>c</sup> *Xavier Vila*,<sup>c</sup> *Xavier Alcobé*,<sup>b</sup> *Mercè Font-Bardia*,<sup>b</sup> and *Rafel Prohens*<sup>\*a</sup>

Manuscript ID: CE-COM-06-2011-005799

**Table 1.** Experimental conditions for the polymorph screening

| Methodology                                                       | N° Exp. | N° Solids | Form obtained (according to XRPD)                              |
|-------------------------------------------------------------------|---------|-----------|----------------------------------------------------------------|
| Precipitations at 0°C                                             | 8       | 4         | Form I, mixture forms I+II                                     |
| Precipitations at r.t. (toluene as antisolvent)                   | 9       | 9         | Form I, mixture I+II, mixture I+VI, mixture I+II+VI            |
| Precipitations at different temperatures (toluene as antisolvent) | 12      | 8         | Form II, form VI, mixture II+VI, mixture I+VI, mixture I+II+VI |
| Precipitations at r.t. (pentane as antisolvent)                   | 3       | 3         | Mixture I+II, mixture I+VI                                     |
| Precipitations at r.t. (heptane as antisolvent)                   | 3       | 3         | Mixture I+II, mixture I+VI, mixture I+II+VI                    |
| Precipitations at 0°C (Et <sub>2</sub> O as antisolvent)          | 9       | 9         | Form I, mixture I+II, mixture I+VI                             |
| Precipitations at 0°C (AcOEt as antisolvent)                      | 10      | 9         | Form I, mixture I+VI                                           |
| Precipitations at 0°C (hexane as antisolvent)                     | 10      | 10        | Form I, form II, mixture I+II, mixture I+VI, mixture I+II+VI   |
| Precipitations at 0°C (heptane as antisolvent)                    | 4       | 4         | Mixture I+II                                                   |
| Precipitations at 0°C (pentane as antisolvent)                    | 4       | 4         | Mixture I+II                                                   |
| Precipitations at 0°C (CHCl <sub>3</sub> as antisolvent)          | 4       | 4         | Form I                                                         |
| Precipitations at -20°C (hexane as antisolvent)                   | 4       | 4         | Mixture I+II, mixture I + III                                  |
| Precipitations at -20°C (heptane as antisolvent)                  | 4       | 4         | Mixture I+II, mixture I+II+III                                 |
| Precipitations at -20°C (pentane as antisolvent)                  | 4       | 4         | Mixture I+II, mixture I+II+III                                 |
| Evaporations under reduced pressure                               | 4       | 4         | Form I, mixture I+III                                          |
| Lyophilization                                                    | 8       | 8         | Form I, mixture I+III, mixture I+II, mixture I+VI              |
| Crystallisations (evaporation of solvent at r.t.)                 | 8       | 8         | Form I                                                         |
| Crystallisations (evaporation of solvent from high temperature)   | 10      | 1         | Form I                                                         |

**Fig. 1** XRPD of experimental and simulated forms I and VI

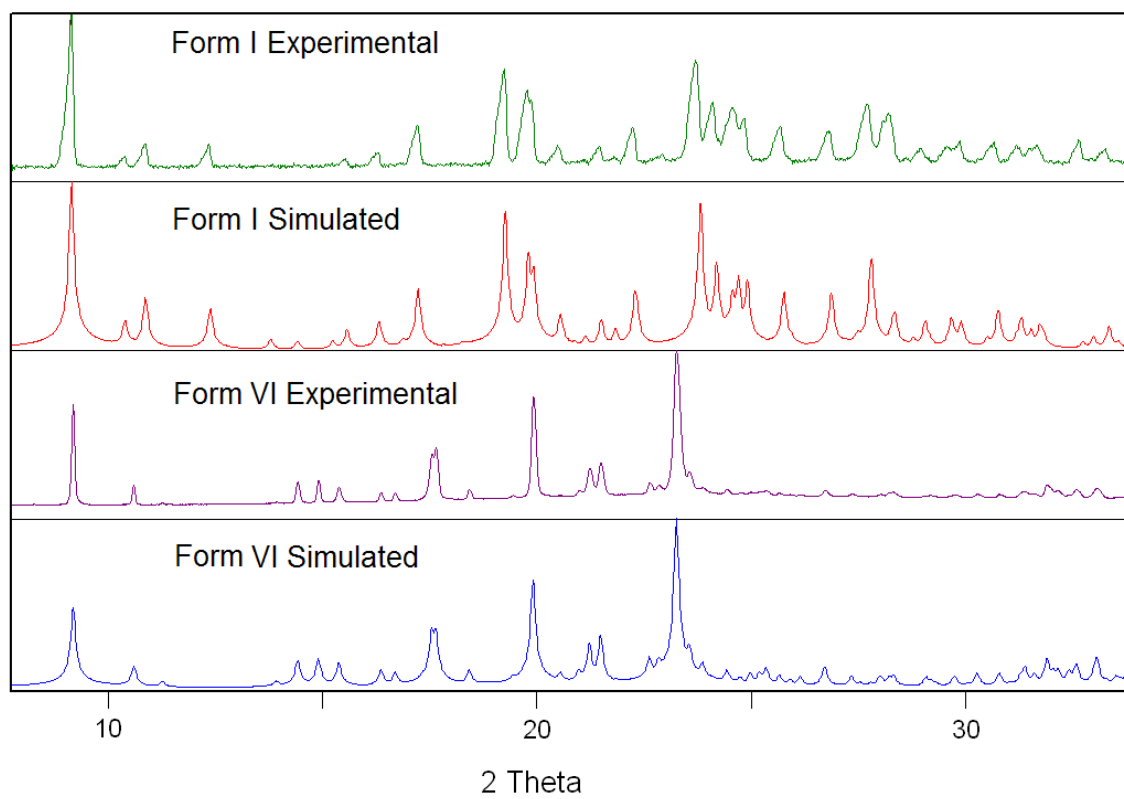

Supplement: c1ce05799e.pdf [file c1ce05799e.pdf]
